# Supplementary material for: Label-Free Detection of Salivary Pepsin Using Gold Nanoparticle/Polypyrrole Nanocoral Modified Screen-Printed Electrode
Source: MDPI journal article supplement (doi:10.3390/s18061685), 2018-05-24
Supplement: s1 [file s1]

## **Supporting Information**

### **Label-free detection of salivary pepsin using gold nanoparticle / polypyrrole nanocoral modified screen-printed electrode**

Doyeon Lee<sup>1</sup>, Young Ju Lee<sup>2</sup>, Young-Gyu Eun<sup>3</sup>, and Gi-Ja Lee<sup>1,2,\*</sup>

<sup>1</sup> Department of Medical Engineering, Graduate School, Kyung Hee University, Seoul 130-701, Korea

<sup>2</sup> Department of Biomedical Engineering, College of Medicine, Kyung Hee University, Seoul 130-701, Korea

<sup>3</sup> Department of Otolaryngology–Head and Neck Surgery, Kyung Hee University Medical Center, Seoul 130-702, Korea

\* To whom correspondence should be addressed. E-mail: [gjlee@khu.ac.kr](mailto:gjlee@khu.ac.kr)

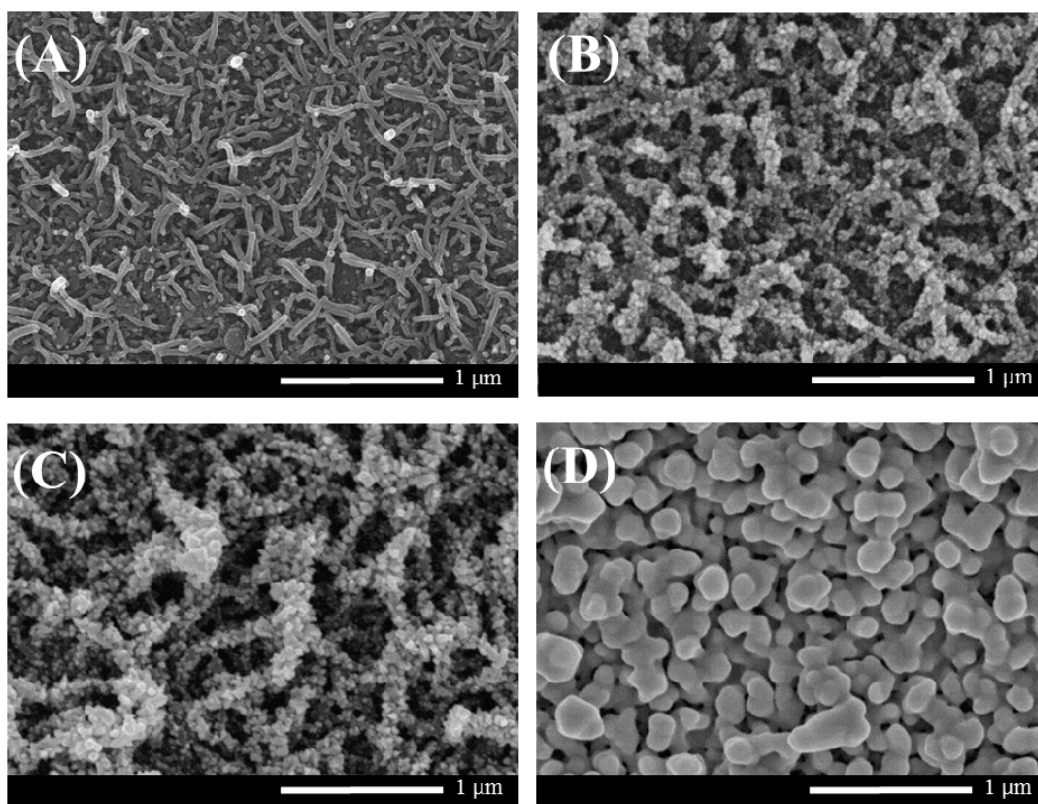

**Figure S1.** The SEM images of GNP/PPNCs/SPCE obtained from (A) 0, (B) 0.5, (C) 1, and (D) 5 mM  $\text{HAuCl}_4 \cdot 3\text{H}_2\text{O}$  solutions containing 0.1 M KCl.
